# Supplementary material
Source: PubMed Central journal article supplement (PMC8217737)
Supplement: mmc1.pdf [file mmc1.pdf]

# **Acceptability of vaccination against COVID-19 and its associated predictors: a systematic review and meta-analysis**

## **Supplement materials**

### **Content**

**Method1: Calculation of relationship between infections and acceptance rates**

**Table S1 Characteristics of 38 included studies**

**Table S2 Quality assessment of 38 included articles**

**Figure S1 Forest plot of acceptance rate**

**Table S3 Results of meta-regression**

**Table S4 Association between willingness rate and cumulative/daily increased cases**

**Table S5 Description of different predictors using HBM framework**

**Table S6 Factors associated with vaccine willingness during influenza pandemic in four systematic reviews**

**References**

**Method1: Calculation of relationship between infections and acceptance rates**

We analyzed the relationship between acceptance rates, number of cumulative infections, and daily increased infections in the global context and surveyed country context during the survey period.

The surveys tended to last for some time. We chose the median time during the survey period as the “specific survey day”, For example, the survey was performed from June 16 to June 20, and we chose the June 18 as the “specific survey day”. We estimated “specific survey day” for each survey reporting the study period. The number of cumulative infections (CI) and daily increased infections (DII) on the “specific survey day” were derived from the WHO website (<https://covid19.who.int/>).

We first analyzed the direct correlation between acceptance rate and CI and DII in the global context. For each “specific survey day”, we reported one willingness rate, CI, and DII. If the “specific survey day” for multiple articles was the same day, we would pool the acceptance rates of these articles.

Then we analyzed the direct correlation between acceptance rate and CI and DII in the surveyed country context. If the study failed to report in detail the acceptance rate of each country, we will delete the study. Similarly, if a country reported multiple rates on the same “specific survey day”, we would pool those rates. Additionally, the association between acceptance and some lagged value of cumulative/ daily infections was explored further.

**Table S1 Characteristics of 38 included studies <sup>a</sup>**

| Ref | First Author          | Journal                                                           | Article paper | Study period               | Surveyed location | Sampling method            | Sample representability | Survey method                         | Study population            | Measurement          | Sample size |
|-----|-----------------------|-------------------------------------------------------------------|---------------|----------------------------|-------------------|----------------------------|-------------------------|---------------------------------------|-----------------------------|----------------------|-------------|
| 1   | Paul L.Reiter         | Vaccine                                                           | Article       | May 2020                   | America           | Convenience sampling       | NA                      | Online                                | Mixed general population    | 5-point Likert scale | 2006        |
| 2   | Harapan Harapan       | Frontiers in Public Health                                        | Article       | March 25 and April 6, 2020 | Indonesia         | Convenience sampling       | NA                      | Online                                | General population and HCWs | Dichotomy scale      | 1359        |
| 3   | Jiahao Wang           | Vaccines                                                          | Article       | March 2020                 | China             | Random stratified sampling | Representative sample   | Online                                | Mixed general population    | 5-point Likert scale | 2058        |
| 4   | Luigi Roberto Biasio  | Human Vaccines & Immunotherapeutics                               | Article       | June 5,2020                | Italy             | Convenience sampling       | NA                      | Online                                | Mixed general population    | 4-point Likert scale | 885         |
| 5   | Dimitrios Papagiannis | International Journal of Environmental Research and Public Health | Article       | February 10-25, 2020       | Greece            | Convenience sampling       | NA                      | Questionnaire via personal interviews | HCWs                        | 5-point Likert scale | 461         |
| 6   | Kimberly A. Fisher    | Annals of Internal Medicine                                       | Article       | April 16-20, 2020          | America           | NA                         | Representative sample   | Online and telephone                  | Mixed general population    | Trichotomy scale     | 991         |

| Ref | First Author       | Journal                           | Article paper  | Study period                    | Surveyed location                                      | Sampling method | Sample representability | Survey method        | Study population         | Measurement           | Sample size |
|-----|--------------------|-----------------------------------|----------------|---------------------------------|--------------------------------------------------------|-----------------|-------------------------|----------------------|--------------------------|-----------------------|-------------|
| 7   | Ran D. Goldman     | Vaccine                           | Article        | March 26 - May 31, 2020         | America, Canada, Israel, Japan, Spain, and Switzerland | NA              | NA                      | Online               | Mixed general population | 10-point Likert scale | 1541        |
| 8   | Ran D. Goldman     | Clinical Therapeutics             | Article        | March 26 - June 30, 2020        | America, Canada, Israel, Japan, Spain, and Switzerland | NA              | NA                      | Online               | Mixed general population | Dichotomy scale       | 2524        |
| 9   | Valerie A Earnshaw | Translational Behavioral Medicine | Article        | April 13–14, 2020               | America                                                | NA              | NA                      | Online               | Mixed general population | 5-point Likert scale  | 845         |
| 10  | Gul Deniz Salali   | Psychological Medicine            | Correspondence | April 30-beginning of June 2020 | UK and Turkey                                          | NA              | NA                      | Online               | Mixed general population | Trichotomy scale      | 5024        |
| 11  | Amy A. Malik       | EClinicalMedicine                 | Article        | May 20, 2020                    | America                                                | NA              | Representative sample   | Online and telephone | Mixed general population | 5-point Likert scale  | 672         |

| Ref | First Author       | Journal                       | Article paper       | Study period               | Surveyed location | Sampling method            | Sample representability | Survey method | Study population            | Measurement          | Sample size |
|-----|--------------------|-------------------------------|---------------------|----------------------------|-------------------|----------------------------|-------------------------|---------------|-----------------------------|----------------------|-------------|
| 12  | Jeremy K. Ward     | Social Science & Medicine     | Short communication | each week of April 2020    | France            | Random stratified sampling | Representative sample   | Online        | Mixed general population    | 4-point Likert scale | 5018        |
| 13  | The COCONEL Group  | The Lancet Infectious Disease | Comment             | March 27–29,2020           | France            | NA                         | Representative sample   | Online        | Mixed general population    | NA                   | 1012        |
| 14  | Jeffrey V. Lazarus | Nature medicine               | Brief Communication | June 16 - 20, 2020         | 19 countries      | Random stratified sampling | NA                      | Online        | Mixed general population    | 5-point Likert scale | 13426       |
| 15  | Kendall Pogue      | Vaccines                      | Article             | NA                         | America           | NA                         | NA                      | Online        | NA                          | 5-point Likert scale | 316         |
| 16  | Kailu Wang         | Vaccine                       | Article             | February 26- March 31,2020 | China             | NA                         | NA                      | Online        | HCWs                        | Trichotomy scale     | 856         |
| 17  | Maëlle Detoc       | Vaccine                       | Article             | March 26 - April 20, 2020  | France            | NA                         | NA                      | Online        | General population and HCWs | 5-point Likert scale | 3259        |
| 18  | Anthea Rhodes      | The Lancet Infectious Disease | Correspondence      | June 15–23, 2020           | Australia         | NA                         | Representative sample   | Online        | Mixed general population    | Trichotomy scale     | 2018        |

| Ref | First Author            | Journal                                     | Article paper         | Study period              | Surveyed location    | Sampling method      | Sample representability | Survey method | Study population                         | Measurement          | Sample size |
|-----|-------------------------|---------------------------------------------|-----------------------|---------------------------|----------------------|----------------------|-------------------------|---------------|------------------------------------------|----------------------|-------------|
| 19  | Christopher Hogan       | International Journal of Emergency Medicine | Brief Research Report | April 20, 2020            | America              | NA                   | NA                      | Online        | Non-healthcare-worker general population | Dichotomy scale      | 101         |
| 20  | Rine Christopher Reuben | Journal of Community Health                 | Article               | March 30 - April 12, 2020 | Nigeria              | Convenience sampling | NA                      | Online        | Mixed general population                 | Trichotomy scale     | 598         |
| 21  | Ahmed Samir Abdelhafiz  | Journal of Community Health                 | Article               | March 20, 2020            | Egypt                | NA                   | NA                      | Online        | Non-healthcare-worker general population | 5-point Likert scale | 559         |
| 22  | Katharine J. Head       | Science Communication                       | Research Notes        | May 4-11, 2020            | America              | NA                   | NA                      | Online        | Mixed general population                 | 7-point Likert scale | 3159        |
| 23  | Luca Pierantoni         | Acta Paediatrica                            | Brief report          | July 10- August 10, 2020  | Italy                | Convenience sampling | NA                      | Online        | Mixed general population                 | Trichotomy scale     | 1812        |
| 24  | Sebastian Neumann-Böhme | The European Journal of Health Economics    | Editorial             | April 2 -15, 2020         | 7 European countries | NA                   | Representative sample   | Online        | Mixed general population                 | Trichotomy scale     | 7662        |

| Ref | First Author         | Journal                              | Article paper | Study period              | Surveyed location                                                               | Sampling method      | Sample representability | Survey method | Study population         | Measurement          | Sample size |
|-----|----------------------|--------------------------------------|---------------|---------------------------|---------------------------------------------------------------------------------|----------------------|-------------------------|---------------|--------------------------|----------------------|-------------|
| 25  | A.R. Jazieh          | Annals of Oncology                   | Abstract      | April 24 - May 15, 2020   | Middle East and North Africa region, Brazil, and the Philippines                | NA                   | NA                      | Online        | HCWs                     | NA                   | 910         |
| 26  | Sadie Bell           | Vaccine                              | Article       | April 19th – May 11, 2020 | UK                                                                              | NA                   | NA                      | Online        | Mixed general population | 4-point Likert scale | 1252        |
| 27  | Khawla F Ali         | Journal of medical internet research | Article       | March 28 - April 4, 2020  | Arabian Gulf countries: Bahrain, Kuwait, Saudi Arabia, and United Arab Emirates | Convenience sampling | NA                      | Online        | Mixed general population | 5-point Likert scale | 5677        |
| 28  | Elijah Edache Ehoche | Borneo Journal of Pharmacy           | Article       | April 4 - May 16, 2020    | Nigeria                                                                         | NA                   | NA                      | Online        | Mixed general population | 4-point Likert scale | 204         |

| Ref | First Author         | Journal                              | Article paper | Study period            | Surveyed location    | Sampling method            | Sample representability | Survey method | Study population                             | Measurement          | Sample size |
|-----|----------------------|--------------------------------------|---------------|-------------------------|----------------------|----------------------------|-------------------------|---------------|----------------------------------------------|----------------------|-------------|
| 29  | Kate Faasse          | Frontiers in Psychology              | Article       | March 2 - March 9, 2020 | Australia            | NA                         | NA                      | Online        | Mixed general population                     | 5-point Likert scale | 2174        |
| 30  | Dong Dong            | Health Expect                        | Article       | June and July, 2020     | China                | NA                         | NA                      | Online        | Mixed general population                     | 5-point Likert scale | 1236        |
| 31  | Guendalina Graffigna | Vaccines                             | Article       | May 2020                | Italy                | Random stratified sampling | NA                      | NA            | Mixed general population                     | 5-point Likert scale | 1004        |
| 32  | Riham Muqattash      | Data in Brief                        | Article       | July 4 - August 4, 2020 | United Arab Emirates | Convenience sampling       | NA                      | Online        | Mixed general population                     | 4-point Likert scale | 1109        |
| 33  | Lynn Williams        | British journal of health psychology | Article       | April 1-11, 2020        | UK                   | Convenience sampling       | NA                      | Online        | Older adults and chronic respiratory disease | 5-point Likert scale | 526         |
| 34  | Li Ping Wong         | Human Vaccines & Immunotherapeutics  | Article       | April 3 – 12, 2020      | Malaysia             | NA                         | NA                      | Online        | Mixed general population                     | 5-point Likert scale | 1159        |
| 35  | Victor Grech         | Early Human Development              | Article       | September 11 – 16, 2020 | Malta                | NA                         | NA                      | Online        | HCWs                                         | 5-point Likert scale | 1002        |



| Ref | First Author   | Journal                          | Article paper  | Study period      | Surveyed location | Sampling method      | Sample representability | Survey method | Study population            | Measurement      | Sample size |
|-----|----------------|----------------------------------|----------------|-------------------|-------------------|----------------------|-------------------------|---------------|-----------------------------|------------------|-------------|
| 36  | Serena Barello | European Journal of Epidemiology | Article        | NA                | Italy             | Convenience sampling | NA                      | NA            | Mixed general population    | Trichotomy scale | 735         |
| 37  | Amiel A. Dror  | European Journal of Epidemiology | Article        | March 19, 2020    | Israeli           | NA                   | NA                      | NA            | General population and HCWs | NA               | 1661        |
| 38  | Rachael H Dodd | The Lancet Infectious Disease    | Correspondence | April 17–21, 2020 | Australia         | NA                   | NA                      | Online        | Mixed general population    | Trichotomy scale | 4362        |

<sup>a</sup> NA represented not applicable; HCWs represented healthcare workers

**Table S2 Quality assessment of 38 included articles**

| Ref | Introduction       |                      | Methods    |              |         |              |           |                           |      |            |                        |                     | Results      |                  |              |              |                | Discussion  |             |                |                  | Other information | Score |
|-----|--------------------|----------------------|------------|--------------|---------|--------------|-----------|---------------------------|------|------------|------------------------|---------------------|--------------|------------------|--------------|--------------|----------------|-------------|-------------|----------------|------------------|-------------------|-------|
|     | Title and abstract | Background/rationale | Objectives | Study design | Setting | Participants | Variables | Data sources/ measurement | Bias | Study size | Quantitative variables | Statistical methods | Participants | Descriptive data | Outcome data | Main results | Other analyses | Key results | Limitations | Interpretation | Generalisability | Funding           |       |
| 1   | 1                  | 1                    | 1          | 1            | 1       | 1            | 1         | 1                         | 0    | 0          | 1                      | 1                   | 0            | 1                | 1            | 1            | 0              | 1           | 1           | 1              | 1                | 1                 | 18    |
| 2   | 1                  | 1                    | 1          | 1            | 1       | 1            | 1         | 1                         | 0    | 0          | 1                      | 1                   | 0            | 1                | 1            | 1            | 0              | 1           | 1           | 1              | 1                | 0                 | 17    |
| 3   | 1                  | 1                    | 1          | 1            | 1       | 1            | 1         | 1                         | 0    | 0          | 1                      | 1                   | 0            | 1                | 1            | 1            | 0              | 1           | 1           | 1              | 1                | 1                 | 18    |
| 4   | 1                  | 1                    | 1          | 1            | 1       | 1            | 1         | 1                         | 0    | 0          | 0                      | 1                   | 0            | 1                | 1            | 1            | 0              | 1           | 1           | 1              | 1                | 0                 | 16    |
| 5   | 1                  | 1                    | 1          | 0            | 1       | 1            | 1         | 1                         | 0    | 0          | 1                      | 1                   | 0            | 1                | 1            | 1            | 1              | 1           | 1           | 1              | 1                | 1                 | 18    |

| Ref | Title and abstract |                      | Methods    |              |         |              |           |                           |      |            |                        |                     | Results      |                  |              |              |                | Discussion  |             |                |                  | Other information | Score |
|-----|--------------------|----------------------|------------|--------------|---------|--------------|-----------|---------------------------|------|------------|------------------------|---------------------|--------------|------------------|--------------|--------------|----------------|-------------|-------------|----------------|------------------|-------------------|-------|
|     | Introduction       | Background/rationale | Objectives | Study design | Setting | Participants | Variables | Data sources/ measurement | Bias | Study size | Quantitative variables | Statistical methods | Participants | Descriptive data | Outcome data | Main results | Other analyses | Key results | Limitations | Interpretation | Generalisability | Funding           |       |
| 6   | 1                  | 1                    | 1          | 1            | 1       | 1            | 1         | 1                         | 0    | 0          | 1                      | 1                   | 0            | 1                | 1            | 1            | 0              | 1           | 1           | 1              | 0                | 1                 | 17    |
| 7   | 1                  | 1                    | 1          | 1            | 1       | 1            | 1         | 0                         | 0    | 0          | 0                      | 1                   | 1            | 1                | 1            | 0            | 0              | 1           | 1           | 1              | 1                | 0                 | 16    |
| 8   | 1                  | 1                    | 1          | 1            | 1       | 1            | 1         | 0                         | 0    | 0          | 0                      | 1                   | 1            | 1                | 1            | 0            | 0              | 1           | 1           | 1              | 1                | 0                 | 16    |
| 9   | 1                  | 1                    | 1          | 1            | 1       | 1            | 1         | 1                         | 0    | 0          | 0                      | 1                   | 1            | 1                | 1            | 0            | 0              | 1           | 1           | 1              | 1                | 1                 | 18    |
| 10  | 1                  | 1                    | 1          | 0            | 1       | 1            | 1         | 1                         | 0    | 0          | 0                      | 0                   | 0            | 0                | 1            | 1            | 0              | 1           | 0           | 0              | 0                | 1                 | 11    |
| 11  | 1                  | 1                    | 1          | 1            | 1       | 1            | 1         | 1                         | 0    | 1          | 1                      | 1                   | 1            | 1                | 1            | 0            | 0              | 1           | 1           | 1              | 1                | 1                 | 20    |
| 12  | 1                  | 1                    | 1          | 1            | 1       | 1            | 1         | 1                         | 0    | 0          | 0                      | 1                   | 0            | 1                | 1            | 0            | 0              | 1           | 1           | 0              | 0                | 1                 | 15    |
| 13  | 1                  | 1                    | 1          | 0            | 1       | 1            | 1         | 0                         | 0    | 0          | 0                      | 0                   | 1            | 1                | 1            | 0            | 0              | 1           | 0           | 0              | 0                | 0                 | 10    |
| 14  | 1                  | 1                    | 1          | 0            | 1       | 1            | 1         | 1                         | 0    | 0          | 1                      | 1                   | 0            | 1                | 1            | 0            | 0              | 1           | 1           | 1              | 0                | 1                 | 16    |
| 15  | 1                  | 1                    | 1          | 1            | 1       | 1            | 1         | 0                         | 0    | 0          | 0                      | 1                   | 0            | 0                | 1            | 1            | 0              | 1           | 1           | 1              | 0                | 1                 | 14    |

| Ref | Title and abstract |                      | Methods    |              |         |              |           |                           |      |            |                        |                     | Results      |                  |              |              |                | Discussion  |             |                |                  | Other information | Score |
|-----|--------------------|----------------------|------------|--------------|---------|--------------|-----------|---------------------------|------|------------|------------------------|---------------------|--------------|------------------|--------------|--------------|----------------|-------------|-------------|----------------|------------------|-------------------|-------|
|     | Introduction       | Background/rationale | Objectives | Study design | Setting | Participants | Variables | Data sources/ measurement | Bias | Study size | Quantitative variables | Statistical methods | Participants | Descriptive data | Outcome data | Main results | Other analyses | Key results | Limitations | Interpretation | Generalisability | Funding           |       |
| 16  | 1                  | 1                    | 1          | 1            | 1       | 1            | 1         | 1                         | 1    | 0          | 1                      | 1                   | 0            | 1                | 1            | 1            | 0              | 1           | 1           | 1              | 1                | 1                 | 19    |
| 17  | 1                  | 1                    | 1          | 1            | 1       | 1            | 1         | 1                         | 0    | 1          | 0                      | 1                   | 0            | 1                | 1            | 1            | 0              | 1           | 1           | 1              | 1                | 1                 | 18    |
| 18  | 1                  | 1                    | 1          | 1            | 1       | 1            | 1         | 0                         | 0    | 0          | 0                      | 0                   | 0            | 0                | 1            | 1            | 0              | 1           | 0           | 0              | 0                | 0                 | 10    |
| 19  | 1                  | 1                    | 1          | 1            | 1       | 1            | 1         | 0                         | 0    | 0          | 0                      | 0                   | 0            | 0                | 1            | 0            | 0              | 1           | 0           | 1              | 0                | 1                 | 11    |
| 20  | 1                  | 1                    | 1          | 1            | 1       | 1            | 1         | 0                         | 0    | 0          | 0                      | 0                   | 0            | 1                | 1            | 1            | 0              | 1           | 0           | 1              | 0                | 0                 | 12    |
| 21  | 1                  | 1                    | 1          | 1            | 1       | 1            | 1         | 0                         | 0    | 1          | 0                      | 1                   | 0            | 1                | 1            | 1            | 0              | 1           | 1           | 1              | 1                | 1                 | 17    |
| 22  | 1                  | 1                    | 1          | 1            | 1       | 1            | 1         | 1                         | 0    | 0          | 0                      | 1                   | 0            | 1                | 1            | 1            | 0              | 1           | 1           | 1              | 1                | 0                 | 16    |
| 23  | 1                  | 1                    | 1          | 1            | 1       | 1            | 1         | 0                         | 0    | 0          | 0                      | 1                   | 0            | 1                | 1            | 1            | 0              | 1           | 1           | 1              | 1                | 0                 | 15    |
| 24  | 1                  | 1                    | 1          | 1            | 1       | 0            | 0         | 0                         | 0    | 0          | 0                      | 0                   | 0            | 1                | 1            | 1            | 0              | 1           | 0           | 0              | 1                | 1                 | 11    |
| 25  | 1                  | 1                    | 1          | 1            | 1       | 1            | 0         | 0                         | 0    | 0          | 0                      | 0                   | 0            | 1                | 1            | 0            | 0              | 0           | 0           | 1              | 0                | 1                 | 10    |

| Ref | Title and abstract |                      | Methods    |              |         |              |           |                           |      |            |                        |                     | Results      |                  |              |              |                | Discussion  |             |                |                  | Other information | Score |
|-----|--------------------|----------------------|------------|--------------|---------|--------------|-----------|---------------------------|------|------------|------------------------|---------------------|--------------|------------------|--------------|--------------|----------------|-------------|-------------|----------------|------------------|-------------------|-------|
|     | Introduction       | Background/rationale | Objectives | Study design | Setting | Participants | Variables | Data sources/ measurement | Bias | Study size | Quantitative variables | Statistical methods | Participants | Descriptive data | Outcome data | Main results | Other analyses | Key results | Limitations | Interpretation | Generalisability | Funding           |       |
| 26  | 1                  | 1                    | 1          | 1            | 1       | 1            | 1         | 1                         | 0    | 0          | 0                      | 1                   | 0            | 1                | 1            | 1            | 0              | 1           | 1           | 1              | 1                | 1                 | 17    |
| 27  | 1                  | 1                    | 1          | 1            | 1       | 1            | 1         | 1                         | 0    | 0          | 1                      | 1                   | 0            | 1                | 1            | 1            | 0              | 1           | 1           | 1              | 1                | 1                 | 18    |
| 28  | 1                  | 1                    | 1          | 1            | 1       | 1            | 1         | 1                         | 0    | 0          | 0                      | 1                   | 0            | 1                | 1            | 1            | 0              | 1           | 0           | 1              | 0                | 1                 | 15    |
| 29  | 1                  | 1                    | 1          | 1            | 1       | 1            | 1         | 1                         | 0    | 0          | 0                      | 1                   | 0            | 1                | 1            | 1            | 0              | 1           | 0           | 1              | 0                | 1                 | 15    |
| 30  | 1                  | 1                    | 1          | 1            | 1       | 1            | 1         | 1                         | 0    | 0          | 0                      | 1                   | 0            | 1                | 1            | 1            | 0              | 1           | 1           | 1              | 1                | 1                 | 17    |
| 31  | 1                  | 1                    | 1          | 1            | 1       | 1            | 1         | 1                         | 0    | 0          | 0                      | 1                   | 0            | 1                | 1            | 1            | 0              | 1           | 1           | 1              | 0                | 1                 | 16    |
| 32  | 1                  | 1                    | 1          | 1            | 1       | 1            | 1         | 1                         | 0    | 0          | 0                      | 0                   | 0            | 1                | 1            | 1            | 0              | 0           | 0           | 0              | 0                | 0                 | 11    |
| 33  | 1                  | 1                    | 1          | 1            | 1       | 1            | 1         | 1                         | 0    | 0          | 0                      | 1                   | 0            | 1                | 1            | 1            | 0              | 1           | 1           | 1              | 1                | 1                 | 17    |
| 34  | 1                  | 1                    | 1          | 1            | 1       | 1            | 1         | 1                         | 0    | 0          | 0                      | 1                   | 0            | 1                | 1            | 1            | 0              | 1           | 1           | 1              | 1                | 1                 | 17    |
| 35  | 1                  | 1                    | 1          | 1            | 1       | 1            | 1         | 1                         | 0    | 0          | 0                      | 1                   | 0            | 1                | 1            | 1            | 0              | 1           | 0           | 1              | 0                | 0                 | 14    |

| Ref | Title and abstract |                      | Methods    |              |         |              |           |                           |      |            |                        |                     | Results      |                  |              |              |                | Discussion  |             |                | Other information | Score   |    |
|-----|--------------------|----------------------|------------|--------------|---------|--------------|-----------|---------------------------|------|------------|------------------------|---------------------|--------------|------------------|--------------|--------------|----------------|-------------|-------------|----------------|-------------------|---------|----|
|     | Introduction       | Background/rationale | Objectives | Study design | Setting | Participants | Variables | Data sources/ measurement | Bias | Study size | Quantitative variables | Statistical methods | Participants | Descriptive data | Outcome data | Main results | Other analyses | Key results | Limitations | Interpretation | Generalisability  | Funding |    |
| 36  | 1                  | 1                    | 1          | 1            | 1       | 1            | 1         | 0                         | 0    | 0          | 1                      | 0                   | 1            | 1                | 1            | 0            | 1              | 0           | 0           | 0              | 0                 | 0       | 12 |
| 37  | 1                  | 1                    | 1          | 1            | 1       | 1            | 1         | 1                         | 0    | 0          | 1                      | 0                   | 1            | 1                | 1            | 0            | 1              | 0           | 1           | 0              | 0                 | 0       | 15 |
| 38  | 1                  | 1                    | 1          | 1            | 1       | 1            | 1         | 0                         | 0    | 0          | 1                      | 0                   | 0            | 1                | 0            | 0            | 1              | 0           | 0           | 0              | 0                 | 0       | 10 |

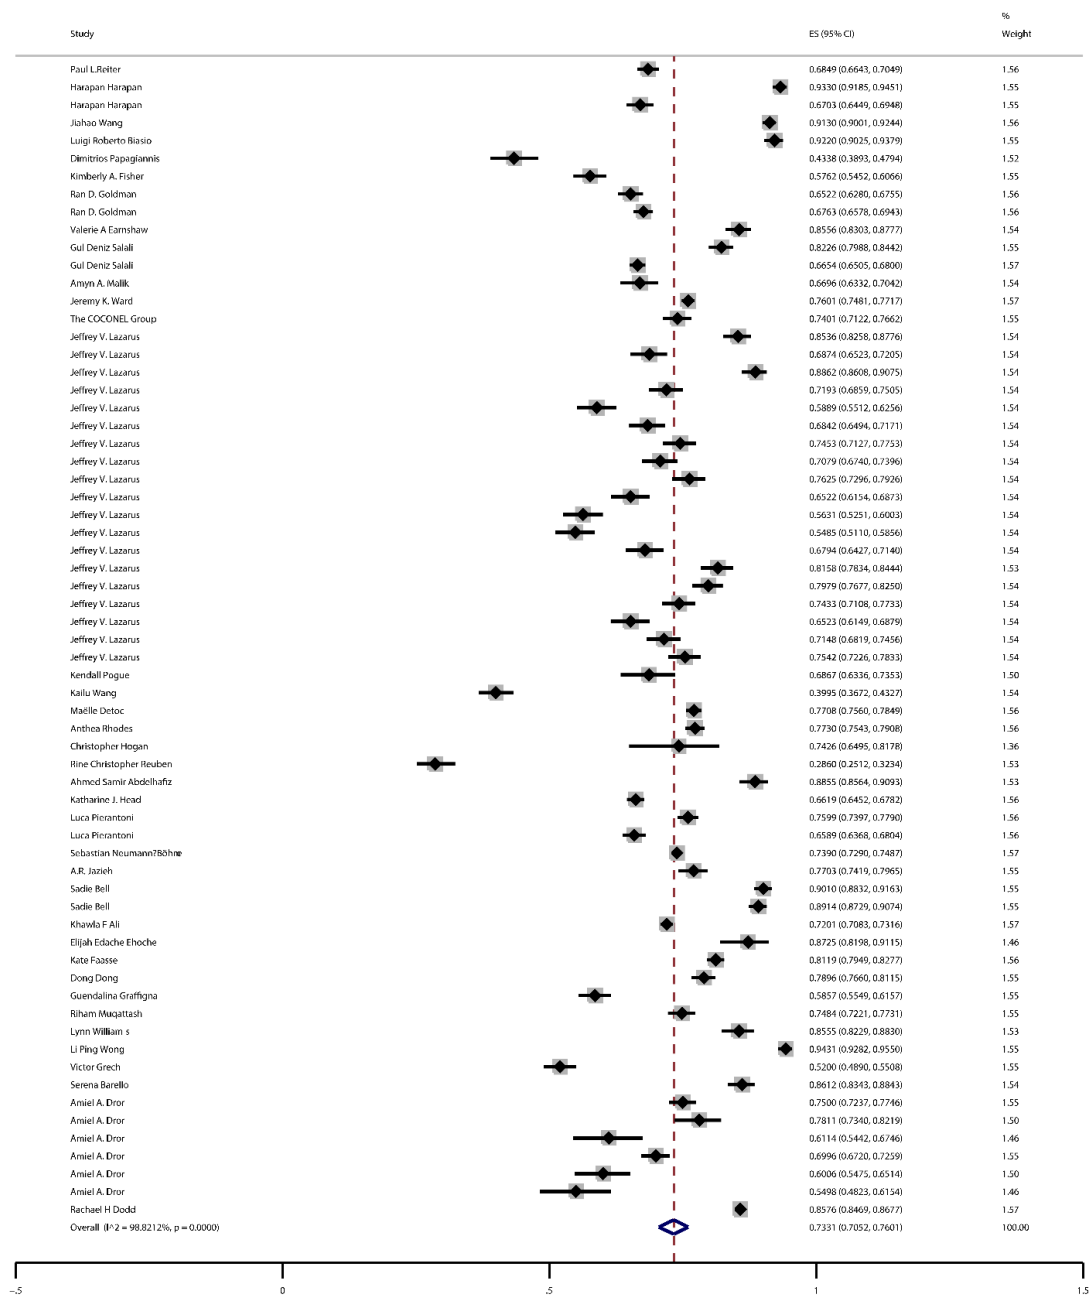

Figure S1 Forest plot of acceptance rate

**Table S3 Results of meta-regression <sup>a</sup>**

| Variables                          |                                                       | Coefficient | 95% CI          | t     | P     | Adjusted R <sup>2</sup> (%) |
|------------------------------------|-------------------------------------------------------|-------------|-----------------|-------|-------|-----------------------------|
| <b>Univariate analysis</b>         |                                                       |             |                 |       |       |                             |
| Sampling method                    | Convenience sampling                                  | ref         | ref             | ref   | ref   | -3.35                       |
|                                    | Random stratified sampling                            | -0.017      | (-0.114,0.079)  | -0.36 | 0.719 |                             |
|                                    | Not mentioned                                         | -0.013      | (-0.104,0.078)  | -0.29 | 0.772 |                             |
| Sample representativeness          | Non-representative sample                             | ref         | ref             | ref   | ref   | -1.74                       |
|                                    | Representative sample                                 | 0.004       | (-0.063,0.070)  | 0.11  | 0.909 |                             |
| Survey population                  | Mixed general population                              | ref         | ref             | ref   | ref   | 14.56                       |
|                                    | HCWs                                                  | -0.158      | (-0.253,-0.064) | -3.34 | 0.001 |                             |
|                                    | General population without HCWs                       | 0.090       | (-0.104,0.283)  | 0.93  | 0.358 |                             |
|                                    | Older adults and chronic respiratory disease patients | 0.116       | (-0.132,0.364)  | 0.93  | 0.354 |                             |
| WHO region                         | Not mentioned                                         | -0.053      | (-0.311,0.205)  | -0.41 | 0.684 | 1.06                        |
|                                    | Americas                                              | ref         | ref             | ref   | ref   |                             |
|                                    | Europe                                                | -0.015      | (-0.106,0.076)  | -0.33 | 0.743 |                             |
|                                    | South-East Asia                                       | 0.063       | (-0.106,0.232)  | 0.75  | 0.458 |                             |
|                                    | Eastern Mediterranean                                 | 0.062       | (-0.107,0.231)  | 0.73  | 0.468 |                             |
|                                    | Africa                                                | -0.072      | (-0.228,0.084)  | -0.93 | 0.358 |                             |
| Country income levels <sup>b</sup> | Western Pacific                                       | 0.066       | (-0.047,0.179)  | 1.18  | 0.244 | 4.42                        |
|                                    | High-income economies                                 | ref         | ref             | ref   | ref   |                             |
|                                    | Upper-Middle-income economies                         | 0.082       | (0.000,0.164)   | 1.99  | 0.051 |                             |
| Study period                       | Lower-Middle-income economies                         | -0.028      | (-0.151,0.095)  | -0.46 | 0.646 | 2.22                        |
|                                    | February                                              | ref         | ref             | ref   | ref   |                             |
|                                    | March                                                 | 0.275       | (0.001,0.55)    | 2.01  | 0.049 |                             |
|                                    | April                                                 | 0.306       | (0.034,0.579)   | 2.25  | 0.028 |                             |
|                                    | May                                                   | 0.310       | (0.038,0.583)   | 2.28  | 0.026 |                             |
|                                    | June                                                  | 0.296       | (0.027,0.564)   | 2.21  | 0.031 |                             |
|                                    | July                                                  | 0.288       | (-0.012,0.589)  | 1.92  | 0.059 |                             |
|                                    | August                                                | -           | -               | -     | -     |                             |
|                                    | September                                             | 0.086       | (-0.279,0.451)  | 0.47  | 0.639 |                             |
| Vaccine recipient                  | Not mentioned                                         | 0.345       | (0.023,0.667)   | 2.14  | 0.036 | -1.21                       |
|                                    | For self                                              | ref         | ref             | ref   | ref   |                             |
| Measurement method                 | For children                                          | -0.027      | (-0.116,0.062)  | -0.61 | 0.542 | 3.62                        |
|                                    | Dichotomy scale                                       | ref         | ref             | ref   | ref   |                             |
|                                    | Trichotomy scale                                      | -0.081      | (-0.231,0.070)  | -1.07 | 0.288 |                             |
|                                    | 4-point Likert scale                                  | 0.091       | (-0.076,0.258)  | 1.10  | 0.278 |                             |
|                                    | 5-point Likert scale                                  | -0.029      | (-0.167,0.108)  | -0.43 | 0.670 |                             |
|                                    | 7-point Likert scale                                  | -0.094      | (-0.373,0.184)  | -0.68 | 0.500 |                             |
|                                    | 10-point Likert scale                                 | -0.104      | (-0.385,0.177)  | -0.74 | 0.461 |                             |
| Vaccine payment                    | Not mentioned                                         | -0.063      | (-0.223,0.097)  | -0.79 | 0.433 | -0.26                       |
|                                    | No free assumption                                    | ref         | ref             | ref   | ref   |                             |
|                                    | Free assumption                                       | 0.086       | (-0.096,0.268)  | 0.95  | 0.348 |                             |
| <b>Multivariate analysis</b>       |                                                       |             |                 |       |       |                             |
| Survey population                  | Mixed general population                              | ref         | ref             | ref   | ref   | 28.02                       |
|                                    | HCWs                                                  | -0.183      | (-0.334,-0.031) | -2.43 | 0.019 |                             |
|                                    | General population without HCWs                       | 0.137       | (-0.085,0.36)   | 1.25  | 0.219 |                             |
|                                    | Older adults and chronic respiratory disease patients | 0.120       | (-0.128,0.367)  | 0.97  | 0.336 |                             |
| Country income levels <sup>b</sup> | Not mentioned                                         | -0.226      | (-0.572,0.119)  | -1.32 | 0.193 | 0.045                       |
|                                    | High-income economies                                 | ref         | ref             | ref   | ref   |                             |
|                                    | Upper-Middle-income economies                         | 0.083       | (0.002,0.165)   | 2.06  | 0.045 |                             |



|                    | <b>Variables</b>              | <b>Coefficient</b> | <b>95% CI</b>  | <b>t</b> | <b>P</b> | <b>Adjusted R<sup>2</sup>(%)</b> |
|--------------------|-------------------------------|--------------------|----------------|----------|----------|----------------------------------|
|                    | Lower-Middle-income economies | -0.093             | (-0.213,0.027) | -1.56    | 0.125    |                                  |
| Study period       | February                      | ref                | ref            | ref      | ref      |                                  |
|                    | March                         | 0.163              | (-0.126,0.452) | 1.14     | 0.261    |                                  |
|                    | April                         | 0.119              | (-0.176,0.415) | 0.81     | 0.420    |                                  |
|                    | May                           | 0.101              | (-0.199,0.400) | 0.68     | 0.502    |                                  |
|                    | June                          | 0.091              | (-0.192,0.375) | 0.65     | 0.519    |                                  |
|                    | July                          | 0.095              | (-0.231,0.421) | 0.59     | 0.559    |                                  |
|                    | August                        | -                  | -              | -        | -        |                                  |
|                    | September                     | 0.086              | (-0.237,0.409) | 0.54     | 0.593    |                                  |
|                    | Not mentioned                 | 0.297              | (-0.083,0.677) | 1.57     | 0.123    |                                  |
| Measurement method | Dichotomy scale               | ref                | ref            | ref      | ref      |                                  |
|                    | Trichotomy scale              | -0.021             | (-0.183,0.142) | -0.25    | 0.800    |                                  |
|                    | 4-point Likert scale          | 0.170              | (0.001,0.340)  | 2.02     | 0.049    |                                  |
|                    | 5-point Likert scale          | 0.031              | (-0.122,0.185) | 0.41     | 0.682    |                                  |
|                    | 7-point Likert scale          | -0.024             | (-0.277,0.230) | -0.19    | 0.852    |                                  |
|                    | 10-point Likert scale         | -0.052             | (-0.325,0.220) | -0.39    | 0.701    |                                  |
|                    | Not mentioned                 | 0.029              | (-0.199,0.258) | 0.26     | 0.798    |                                  |

<sup>a</sup> HCWs: healthcare workers; -: No data; ref: as the reference

<sup>b</sup> division came from <https://datahelpdesk.worldbank.org/knowledgebase/articles/906519-world-bank-country-and-lending-groups>

**Table S4 Association between willingness rate and cumulative/daily increased cases<sup>a</sup>**

| Context | Variables                       | Lagged 0 day |       | Lagged 1 day |       | Lagged 2 days |       | Lagged 5 days |       |
|---------|---------------------------------|--------------|-------|--------------|-------|---------------|-------|---------------|-------|
|         |                                 | r            | p     | r            | p     | r             | p     | r             | p     |
| Global  | Number of cumulative infections | -0.037       | 0.842 | -0.027       | 0.883 | -0.032        | 0.861 | -0.032        | 0.861 |
|         | daily increased infections      | -0.077       | 0.674 | 0.013        | 0.943 | 0.021         | 0.908 | 0.108         | 0.556 |
| Country | Number of cumulative infections | -0.062       | 0.668 | -0.044       | 0.762 | -0.041        | 0.781 | -0.055        | 0.709 |
|         | daily increased infections      | -0.092       | 0.523 | -0.035       | 0.814 | -0.073        | 0.621 | -0.075        | 0.610 |

<sup>a</sup> the association between willingness rate and cumulative/daily increased in different lagged values (0 day, 1 day, 2 days, and 5 days).

**Table S5 Description of different predictors using HBM framework<sup>a</sup>**

| HBM framework                                     |                                                                   | Predictors                                         | Reference                                     |           |
|---------------------------------------------------|-------------------------------------------------------------------|----------------------------------------------------|-----------------------------------------------|-----------|
| Perceived susceptibility and severity of COVID-19 | Perceived susceptibility and severity of COVID-19                 | Likelihood of being infected with COVID-19         | 2,6,10,16,17,29,34                            |           |
|                                                   |                                                                   | Concern about outbreak                             | 23,29                                         |           |
| Perceived benefits and risks of acceptance        | Perceived benefits of acceptance<br>Perceived risks of acceptance | Protecting self or others                          | 17,26                                         |           |
|                                                   |                                                                   | Concerns about side effects and safety             | 6, 18,24,26                                   |           |
| Modifying Factors                                 | Socio-demographics                                                | Gender                                             | 1,2,5,6,7,10,11,12,14,16,17,18,27,29,30,34,35 |           |
|                                                   |                                                                   | Age                                                | 1,2,5,6,7,11,12,14,16,18,22,26,27,29,34,35    |           |
|                                                   |                                                                   | Education level                                    | 1,2,6,7,10,11,12,14,18,22,23, 29,34           |           |
|                                                   |                                                                   | Income                                             | 1,2,6,12,14,18,22,23,26,34                    |           |
|                                                   |                                                                   | Race/Ethnicity                                     | 1,6,11,22,26,29,34                            |           |
|                                                   |                                                                   | Employment Status                                  | 6,11,18,22,26,37                              |           |
|                                                   |                                                                   | Urbanicity                                         | 1,2,6,30,34                                   |           |
|                                                   |                                                                   | Geographic location                                | 1,6,23,29                                     |           |
|                                                   |                                                                   | Having child(children)                             | 10,22,30                                      |           |
|                                                   |                                                                   | Marital status                                     | 1,2,6                                         |           |
|                                                   |                                                                   | Occupation                                         | 2,34                                          |           |
|                                                   |                                                                   | Knowledge, attitude, beliefs, and prior experience | Having chronic conditions                     | 16,17,34  |
|                                                   |                                                                   |                                                    | Self-rated overall health                     | 6,29      |
|                                                   |                                                                   | Trust                                              | Influenza vaccination in the past season      | 6,7,16,29 |
| Trust in government                               | 14,29                                                             |                                                    |                                               |           |
| Cues to Action                                    | Interpersonal relationships<br>Community                          | Family member/friend ever diagnosed with COVID-19  | 1,14,34                                       |           |
|                                                   |                                                                   | Media exposure                                     | 10,29                                         |           |
|                                                   |                                                                   | Political leaning                                  | 1,15,22                                       |           |

<sup>a</sup> HBM: health belief model

**Table S6 Factors associated with vaccine willingness during influenza pandemic in four systematic reviews**

| <b>Variables</b>   | <b>Nguyen et al <sup>39</sup></b>                                                                                                                                                                                                                                                                            | <b>Bish et al <sup>40</sup></b>                                                                                                                                                                                                                                  | <b>Prematunge et al <sup>41</sup></b>                                                                                                                                                                                                                                                                                               | <b>Brien et al <sup>42</sup></b>                                                                                                                                                                                                                 | <b>Our study</b>                                                                                                                                                                                                |
|--------------------|--------------------------------------------------------------------------------------------------------------------------------------------------------------------------------------------------------------------------------------------------------------------------------------------------------------|------------------------------------------------------------------------------------------------------------------------------------------------------------------------------------------------------------------------------------------------------------------|-------------------------------------------------------------------------------------------------------------------------------------------------------------------------------------------------------------------------------------------------------------------------------------------------------------------------------------|--------------------------------------------------------------------------------------------------------------------------------------------------------------------------------------------------------------------------------------------------|-----------------------------------------------------------------------------------------------------------------------------------------------------------------------------------------------------------------|
| Included studies   | 10                                                                                                                                                                                                                                                                                                           | 37                                                                                                                                                                                                                                                               | 20                                                                                                                                                                                                                                                                                                                                  | 27                                                                                                                                                                                                                                               | 38                                                                                                                                                                                                              |
| Using model/theory | NA                                                                                                                                                                                                                                                                                                           | Protection Motivation Theory                                                                                                                                                                                                                                     | Health Belief Model                                                                                                                                                                                                                                                                                                                 | NA                                                                                                                                                                                                                                               | Health Belief Model                                                                                                                                                                                             |
| Populations        | General populations                                                                                                                                                                                                                                                                                          | General population, health care professionals, pregnant women, clinical risk groups or parents                                                                                                                                                                   | Healthcare workers                                                                                                                                                                                                                                                                                                                  | All populations                                                                                                                                                                                                                                  | All populations                                                                                                                                                                                                 |
| Factors            | <b>Personal risk perception</b> <ul style="list-style-type: none"> <li>Proximity/severity of public health issue <sup>a</sup></li> <li>Severity of personal consequences from illness <sup>a</sup></li> <li>Risk of infection <sup>a</sup></li> <li>Harm/adverse events from vaccine <sup>b</sup></li> </ul> | <b>Threat appraisal</b> <ul style="list-style-type: none"> <li>Perceptions of personal risk (high vs low) <sup>a</sup></li> <li>Perceptions of the severity of the pandemic (severe vs mild) <sup>a</sup></li> <li>Anxiety (high vs low) <sup>a</sup></li> </ul> | <b>Perceived barriers to pandemic H1N1 (pH1N1) vaccination</b> <ul style="list-style-type: none"> <li>Pandemic vaccine safety and vaccine related adverse effect <sup>b</sup></li> <li>Rapidity of pandemic vaccine development <sup>b</sup></li> <li>Pandemic vaccine will NOT be effective or efficacious <sup>b</sup></li> </ul> | <b>Socioeconomic and demographic factors</b> <ul style="list-style-type: none"> <li>Sex <sup>c</sup></li> <li>Age <sup>c</sup></li> <li>Ethnicity <sup>c</sup></li> <li>Occupation <sup>c</sup></li> <li>Education level <sup>c</sup></li> </ul> | <b>Perceived susceptibility and severity of COVID-19</b> <ul style="list-style-type: none"> <li>Likelihood of being infected with COVID-19 <sup>c</sup></li> <li>Concern about outbreak <sup>c</sup></li> </ul> |

| Variables | Nguyen et al <sup>39</sup>                                                                                                                                                                                                                                                                                     | Bish et al <sup>40</sup>                                                                                                                                                                                                                                                                                                                                                                                                                                                                                                                                                                                                                                                            | Prematunge et al <sup>41</sup>                                                                                                                                                                                                                                                                                        | Brien et al <sup>42</sup>                                                                                                                                                                 | Our study                                                                                                                                  |
|-----------|----------------------------------------------------------------------------------------------------------------------------------------------------------------------------------------------------------------------------------------------------------------------------------------------------------------|-------------------------------------------------------------------------------------------------------------------------------------------------------------------------------------------------------------------------------------------------------------------------------------------------------------------------------------------------------------------------------------------------------------------------------------------------------------------------------------------------------------------------------------------------------------------------------------------------------------------------------------------------------------------------------------|-----------------------------------------------------------------------------------------------------------------------------------------------------------------------------------------------------------------------------------------------------------------------------------------------------------------------|-------------------------------------------------------------------------------------------------------------------------------------------------------------------------------------------|--------------------------------------------------------------------------------------------------------------------------------------------|
|           | <b>Vaccination attitude</b> <ul style="list-style-type: none"> <li>Acceptance of previous vaccination <sup>a</sup></li> <li>Belief of vaccine (in)effectiveness or (not) necessary <sup>c</sup></li> <li>Anti-vaccination attitude <sup>c</sup></li> </ul>                                                     | <b>Coping appraisal</b> <ul style="list-style-type: none"> <li>Perceived efficacy of vaccine in protecting against H1N1 influenza (yes vs no) <sup>a</sup></li> <li>Perceived barriers to having the vaccine (more concerns about safety and fear of side effects) <sup>b</sup></li> <li>Social influences (trust in health professionals or the health care system) <sup>a</sup> (uptake of family and friends) <sup>a</sup> (healthcare workers and colleague recommend) <sup>a</sup></li> <li>Sources of information about vaccination (get information from official departments) <sup>a</sup></li> <li>Previous vaccination against seasonal influenza <sup>a</sup></li> </ul> | <b>Perceived benefits of pH1N1 vaccination</b> <ul style="list-style-type: none"> <li>Pandemic vaccine will protect self <sup>a</sup></li> <li>Pandemic vaccine will protect loved ones (e.g. family and friends) and colleagues <sup>a</sup></li> <li>Pandemic vaccine will protect patients <sup>a</sup></li> </ul> | <b>Regional and household characteristics</b> <ul style="list-style-type: none"> <li>Region of residence <sup>c</sup></li> <li>Household numbers <sup>a</sup></li> </ul>                  | <b>Perceived benefits of acceptance</b> <ul style="list-style-type: none"> <li>Protecting self or others<sup>a</sup></li> </ul>            |
|           | <b>Communications/ information sources</b> <ul style="list-style-type: none"> <li>Recommendations from health care professionals <sup>c</sup></li> <li>Public health messages <sup>c</sup></li> <li>Knowledge of disease/vaccine <sup>c</sup></li> <li>Influence of family and friends <sup>c</sup></li> </ul> | <b>Demographic factors</b> <ul style="list-style-type: none"> <li>Age <sup>c</sup></li> <li>Gender (men vs women) <sup>c</sup></li> <li>Ethnicity (ethnic minorities vs ethnic majorities) <sup>a</sup></li> <li>Professional role <sup>c</sup></li> <li>Socio-economic factors<sup>c</sup></li> <li>Actual risk (actual high-risk vs actual low-risk) <sup>a</sup></li> </ul>                                                                                                                                                                                                                                                                                                      | <b>Perceived susceptibility</b> <ul style="list-style-type: none"> <li>Risk of pH1N1 influenza infection <sup>a</sup></li> <li>Immunity from pandemic influenza infection due to previous exposure <sup>b</sup></li> </ul>                                                                                            | <b>Health status and behaviors</b> <ul style="list-style-type: none"> <li>Seasonal influenza vaccination receipt <sup>a</sup></li> <li>Priority group (high-risk) <sup>a</sup></li> </ul> | <b>Perceived risks of acceptance</b> <ul style="list-style-type: none"> <li>Concerns about side effects and safety <sup>b</sup></li> </ul> |

| Variables | Nguyen et al <sup>39</sup>                                                                                                                                                                                                                 | Bish et al <sup>40</sup> | Prematunge et al <sup>41</sup>                                                                                                                                   | Brien et al <sup>42</sup>                                                                                                                                                                                                                                                                                                                                                                                          | Our study                                                                                                                                                                                                                                                                                                                                                                                                                                                                                                                                                                                                                                                                                                                                                                                              |
|-----------|--------------------------------------------------------------------------------------------------------------------------------------------------------------------------------------------------------------------------------------------|--------------------------|------------------------------------------------------------------------------------------------------------------------------------------------------------------|--------------------------------------------------------------------------------------------------------------------------------------------------------------------------------------------------------------------------------------------------------------------------------------------------------------------------------------------------------------------------------------------------------------------|--------------------------------------------------------------------------------------------------------------------------------------------------------------------------------------------------------------------------------------------------------------------------------------------------------------------------------------------------------------------------------------------------------------------------------------------------------------------------------------------------------------------------------------------------------------------------------------------------------------------------------------------------------------------------------------------------------------------------------------------------------------------------------------------------------|
|           | <b>Access</b> <ul style="list-style-type: none"> <li>• Priority group <sup>c</sup></li> <li>• Convenience/inconvenience <sup>c</sup></li> <li>• Financial costs/insurance <sup>c</sup></li> <li>• Vaccine delivery <sup>c</sup></li> </ul> |                          | <b>Perceived severity</b> <ul style="list-style-type: none"> <li>• Severity or seriousness of pH1N1 influenza infection (severe vs mild) <sup>a</sup></li> </ul> | <b>Belief and perceptions</b> <ul style="list-style-type: none"> <li>• Believing that the vaccine is safe or without risk of side effects <sup>a</sup></li> <li>• Believing in the efficacy/effectiveness of the vaccine and its benefits <sup>a</sup></li> <li>• Perception of susceptibility to infection <sup>a</sup></li> <li>• Perception that pandemic influenza infection is severe <sup>a</sup></li> </ul> | <b>Modifying Factors</b> <ul style="list-style-type: none"> <li>• Socio-demographics (Gender, man vs women) <sup>a</sup><br/>(Age) <sup>c</sup><br/>(Education level, college degree or higher vs high school or below) <sup>a</sup><br/>(Income) <sup>c</sup><br/>(Race/Ethnicity) <sup>c</sup><br/>(Employment Status) <sup>c</sup><br/>(Urbanicity) <sup>c</sup><br/>(Geographic location) <sup>c</sup><br/>(Having child) <sup>c</sup><br/>(Marital status) <sup>c</sup><br/>(Occupation) <sup>c</sup></li> <li>• Knowledge, attitude, beliefs, and prior experience<br/>(Having chronic conditions) <sup>c</sup><br/>(Self-rated overall health) <sup>c</sup><br/>(Having influenza vaccination in the past season) <sup>a</sup></li> <li>• Trust<br/>Trust in government <sup>a</sup></li> </ul> |

| Variables | Nguyen et al <sup>39</sup>                                                                                                                                                                                                                                                                                                                                                                                                  | Bish et al <sup>40</sup> | Prematunge et al <sup>41</sup>                                                                                                                                                                                                                                                                                                                                   | Brien et al <sup>42</sup>                                                                                                                                                                                                                                                                                                                            | Our study                                                                                                                                                                                                                      |
|-----------|-----------------------------------------------------------------------------------------------------------------------------------------------------------------------------------------------------------------------------------------------------------------------------------------------------------------------------------------------------------------------------------------------------------------------------|--------------------------|------------------------------------------------------------------------------------------------------------------------------------------------------------------------------------------------------------------------------------------------------------------------------------------------------------------------------------------------------------------|------------------------------------------------------------------------------------------------------------------------------------------------------------------------------------------------------------------------------------------------------------------------------------------------------------------------------------------------------|--------------------------------------------------------------------------------------------------------------------------------------------------------------------------------------------------------------------------------|
|           | <b>Demographic</b> <ul style="list-style-type: none"> <li>• Age <sup>c</sup></li> <li>• Sex <sup>c</sup></li> <li>• Ethnicity (non-Caucasian VS Caucasian) <sup>a</sup></li> <li>• Education <sup>c</sup></li> <li>• Community/household-related factors <sup>c</sup></li> <li>• Personal health <sup>c</sup></li> <li>• Occupation/social grade/work status <sup>c</sup></li> <li>• Marital status <sup>c</sup></li> </ul> |                          | <b>Cues to action</b> <ul style="list-style-type: none"> <li>• Mass media <sup>b</sup></li> <li>• Access of scientific literature and information sources <sup>a</sup></li> <li>• Trust in public health authority</li> <li>• Person based cues to action (i.e. physician, family members, supervisor, co-workers, or political figures) <sup>a</sup></li> </ul> | <b>Information, knowledge and advice</b> <ul style="list-style-type: none"> <li>• Having the correct knowledge <sup>a</sup></li> <li>• Obtaining information from official sources <sup>a</sup></li> <li>• Receiving a recommendation or advice from a health professional, an employer/co-worker, or a spouse/family/friend <sup>a</sup></li> </ul> | <b>Cues to Action</b> <ul style="list-style-type: none"> <li>• Family member/friend ever diagnosed with COVID-19 <sup>c</sup></li> <li>• More Media exposure <sup>a</sup></li> <li>• Political leaning <sup>c</sup></li> </ul> |
|           | <b>Others</b> <ul style="list-style-type: none"> <li>• Societal role/responsibility <sup>a</sup></li> <li>• Self-protection <sup>c</sup></li> <li>• Alternative methods of protection <sup>a</sup></li> <li>• Government preparedness/ Trust in government <sup>c</sup></li> <li>• Employment <sup>c</sup></li> </ul>                                                                                                       |                          | <b>Other factors</b><br>(take seasonal influenza vaccination vs no) <sup>a</sup>                                                                                                                                                                                                                                                                                 |                                                                                                                                                                                                                                                                                                                                                      |                                                                                                                                                                                                                                |

<sup>a</sup> increase the willingness to be vaccinated, <sup>b</sup> reduce the willingness to be vaccinated, <sup>c</sup> no clear/no significant result

## References

1. Reiter PL, Pennell ML, Katz ML. Acceptability of a COVID-19 vaccine among adults in the United States: How many people would get vaccinated? *Vaccine*. 2020; 38(42): 6500-7.
2. Harapan H, Wagner AL, Yufika A, et al. Acceptance of a COVID-19 Vaccine in Southeast Asia: A Cross-Sectional Study in Indonesia. *Front Public Health*. 2020; 8: 381.
3. Wang J, Jing R, Lai X, et al. Acceptance of COVID-19 Vaccination during the COVID-19 Pandemic in China. *Vaccines*. 2020; 8(3).
4. Biasio LR, Bonaccorsi G, Lorini C, Pecorelli S. Assessing COVID-19 vaccine literacy: a preliminary online survey. *Hum Vaccin Immunother*. 2020: 1-9.
5. Papagiannis D, Malli F, Raptis DG, et al. Assessment of Knowledge, Attitudes, and Practices towards New Coronavirus (SARS-CoV-2) of Health Care Professionals in Greece before the Outbreak Period. *Int J Environ Res Public Health*. 2020; 17(14).
6. Fisher KA, Bloomstone SJ, Walder J, Crawford S, Fouayzi H, Mazor KM. Attitudes Toward a Potential SARS-CoV-2 Vaccine : A Survey of U.S. Adults. *Ann Intern Med*. 2020;173(12):964-973. doi:10.7326/M20-3569
7. Goldman RD, Yan TD, Seiler M, et al. Caregiver willingness to vaccinate their children against COVID-19: Cross sectional survey. *Vaccine*. 2020; 38(48): 7668-73.
8. Goldman RD, Marneni SR, Seiler M, et al. Caregivers' Willingness to Accept Expedited Vaccine Research During the COVID-19 Pandemic: A Cross-sectional Survey. *Clin Ther*. 2020;42(11):2124-2133. doi:10.1016/j.clinthera.2020.09.012
9. Earnshaw VA, Eaton LA, Kalichman SC, Brousseau NM, Hill EC, Fox AB. COVID-19 conspiracy beliefs, health behaviors, and policy support. *Transl Behav Med*. 2020; 10(4): 850-6.
10. Salali GD, Uysal MS. COVID-19 vaccine hesitancy is associated with beliefs on the origin of the novel coronavirus in the UK and Turkey. *Psychol Med*. 2020: 1-3.
11. Malik AA, McFadden SM, Elharake J, Omer SB. Determinants of COVID-19 vaccine acceptance in the US. *EClinicalMedicine*. 2020; 26: 100495.
12. Ward JK, Alleaume C, Peretti-Watel P. The French public's attitudes to a future COVID-19 vaccine: The politicization of a public health issue. *Social science & medicine (1982)*. 2020; 265: 113414.
13. COCONEL Group. A future vaccination campaign against COVID-19 at risk of vaccine hesitancy and politicisation. *Lancet Infect Dis*. 2020;20(7):769-770. doi:10.1016/S1473-3099(20)30426-6
14. Lazarus JV, Ratzan SC, Palayew A, et al. A global survey of potential acceptance of a COVID-19 vaccine. *Nat Med*. 2020: 1-4. doi:10.1038/s41591-020-1124-9
15. Pogue K, Jensen JL, Stancil CK, et al. Influences on Attitudes Regarding Potential COVID-19 Vaccination in the United States. *Vaccines*. 2020; 8(4). doi:10.3390/vaccines8040582
16. Wang K, Wong ELY, Ho KF, et al. Intention of nurses to accept coronavirus disease 2019 vaccination and change of intention to accept seasonal influenza vaccination during the coronavirus disease 2019 pandemic: A cross-sectional survey. *Vaccine*. 2020; 38(45): 7049-56.
17. Detoc M, Bruel S, Frappe P, Tardy B, Botelho-Nevers E, Gagneux-Brunon A. Intention to participate in a COVID-19 vaccine clinical trial and to get vaccinated against COVID-19 in France during the pandemic. *Vaccine*. 2020; 38(45): 7002-6. doi:10.1016/j.vaccine.2020.09.021
18. Rhodes A, Hoq M, Measey MA, Danchin M. Intention to vaccinate against COVID-19 in Australia. *Lancet Infect Dis*. 2020;S1473-3099(20)30724-6. doi:10.1016/S1473-3099(20)30724-6
19. Hogan C, Atta M, Anderson P, et al. Knowledge and attitudes of us adults regarding COVID-19. *Int J Emerg Med*. 2020;13(1):53. doi:10.1186/s12245-020-00309-6.
20. Reuben RC, Danladi MMA, Saleh DA, Ejembi PE. Knowledge, Attitudes and Practices Towards COVID-19: An Epidemiological Survey in North-Central Nigeria. *J Community Health* 2020: 1-14. doi:10.1007/s10900-020-00881-1
21. Abdelhafiz AS, Mohammed Z, Ibrahim ME, et al. Knowledge, Perceptions, and Attitude of Egyptians Towards the Novel Coronavirus Disease (COVID-19). *J Community Health* 2020; 45(5): 881-90. doi:10.1007/s10900-020-00827-7
22. Head KJ, Kasting ML, Sturm LA, Hartsock JA, Zimet GD. A National Survey Assessing SARS-CoV-2 Vaccination Intentions: Implications for Future Public Health Communication Efforts. *Science Communication* 2020; 42(5): 698-723. doi:10.1177/1075547020960463
23. Pierantoni L, Lenzi J, Lanari M, et al. Nationwide COVID-19 survey of Italian parents reveals useful information on attitudes to school attendance, medical support, vaccines and drug trials. *Acta paediatrica* 2020. doi:10.1111/apa.15614
24. Neumann-Bohme S, Varghese NE, Sabat I, et al. Once we have it, will we use it? A European survey on willingness to be vaccinated against COVID-19. *European Journal of Health Economics* 2020; 21(7): 977-82. doi:10.1007/s10198-020-01208-6
25. Jazieh AR, Coutinho AK, Bensalem A, et al. Oncologists knowledge, attitude and practice in



- COVID-19 pandemic and its negative impact on them: An international study. *Annals of Oncology* 2020; 31: S998. doi:10.1016/j.annonc.2020.08.1751
26. Bell S, Clarke R, Mounier-Jack S, Walker JL, Paterson P. Parents' and guardians' views on the acceptability of a future COVID-19 vaccine: A multi-methods study in England. *Vaccine*. 2020;38(49):7789-7798. doi:10.1016/j.vaccine.2020.10.027
  27. Ali KF, Whitebridge S, Jamal MH, Alsafy M, Atkin SL. Perceptions, Knowledge, and Behaviors Related to COVID-19 Among Social Media Users: Cross-Sectional Study. *J Med Internet Res* 2020; 22(9): e19913. doi:10.2196/19913
  28. Ehoche EE, Adejoh J, Idoko J, Madu C. Preliminary survey on knowledge, attitudes, and practices about the COVID-19 Pandemic among Residents in North Central Nigeria. *Borneo Journal of Pharmacy* 2020; 3: 121-9. doi:10.33084/bjop.v3iSpecial-1.1413
  29. Faasse K, Newby JM. Public Perceptions of COVID-19 in Australia: Perceived Risk, Knowledge, Health-Protective Behaviors, and Vaccine Intentions. *Frontiers in psychology* 2020; 11. doi:10.3389/fpsyg.2020.551004
  30. Dong D, Xu RH, Wong EL, et al. Public preference for COVID-19 vaccines in China: A discrete choice experiment. *Health Expect*. 2020;23(6):1543-1578. doi:10.1111/hex.13140
  31. Graffigna G, Palamenghi L, Boccia S, Barello S. Relationship between Citizens' Health Engagement and Intention to Take the COVID-19 Vaccine in Italy: A Mediation Analysis. *Vaccines*. 2020; 8(4). doi:10.3390/vaccines8040576
  32. Muqattash R, Niankara I, Traoret RI. Survey data for COVID-19 vaccine preference analysis in the United Arab Emirates. *Data Brief* 2020; 33: 106446. doi:10.1016/j.dib.2020.106446
  33. Williams L, Gallant AJ, Rasmussen S, et al. Towards intervention development to increase the uptake of COVID-19 vaccination among those at high risk: Outlining evidence-based and theoretically informed future intervention content. *Br J Health Psychol* 2020; 25(4): 1039-54. doi:10.1111/bjhp.12468
  34. Wong LP, Alias H, Wong P-F, Lee HY, AbuBakar S. The use of the health belief model to assess predictors of intent to receive the COVID-19 vaccine and willingness to pay. *Human Vaccines Immunother* 2020; 16(9): 2204-14. doi:10.1080/21645515.2020.1790279
  35. Grech V, Gauci C, Agius S. Vaccine hesitancy among Maltese healthcare workers toward influenza and novel COVID-19 vaccination. *Early Hum Dev* 2020: 105213. doi:10.1016/j.earlhumdev.2020.105213
  36. Barello S, Nania T, Dellafiore F, Graffigna G, Caruso R. 'Vaccine hesitancy' among university students in Italy during the COVID-19 pandemic. *Eur J Epidemiol* 2020; 35(8): 781-3. doi:10.1007/s10654-020-00670-z
  37. Dror AA, Eisenbach N, Taiber S, et al. Vaccine hesitancy: the next challenge in the fight against COVID-19. *Eur J Epidemiol* 2020; 35(8): 775-9. doi:10.1007/s10654-020-00671-y.
  38. Dodd RH, Cvejic E, Bonner C, Pickles K, McCaffery KJ. Willingness to vaccinate against COVID-19 in Australia. *The Lancet Infectious diseases* 2020. doi:10.1016/s1473-3099(20)30559-4
  39. Nguyen T, Henningsen KH, Brehaut JC, Hoe E, Wilson K. Acceptance of a pandemic influenza vaccine: a systematic review of surveys of the general public. *Infect Drug Resist*. 2011;4:197-207. doi:10.2147/IDR.S23174
  40. Bish A, Yardley L, Nicoll A, Michie S. Factors associated with uptake of vaccination against pandemic influenza: a systematic review. *Vaccine*. 2011;29(38):6472-6484. doi:10.1016/j.vaccine.2011.06.107
  41. Prematunge C, Corace K, McCarthy A, Nair RC, Pugsley R, Garber G. Factors influencing pandemic influenza vaccination of healthcare workers--a systematic review. *Vaccine*. 2012;30(32):4733-4743. doi:10.1016/j.vaccine.2012.05.018
  42. Brien S, Kwong JC, Buckeridge DL. The determinants of 2009 pandemic A/H1N1 influenza vaccination: a systematic review. *Vaccine*. 2012;30(7):1255-1264. doi:10.1016/j.vaccine.2011.12.089
